# Supplementary material
Source: publisher site journal article supplement (https://www.dovepress.com/article/580089)
Supplement: Supplementary file 1 [file 580089_RSupplementary_figure1_1.docx]

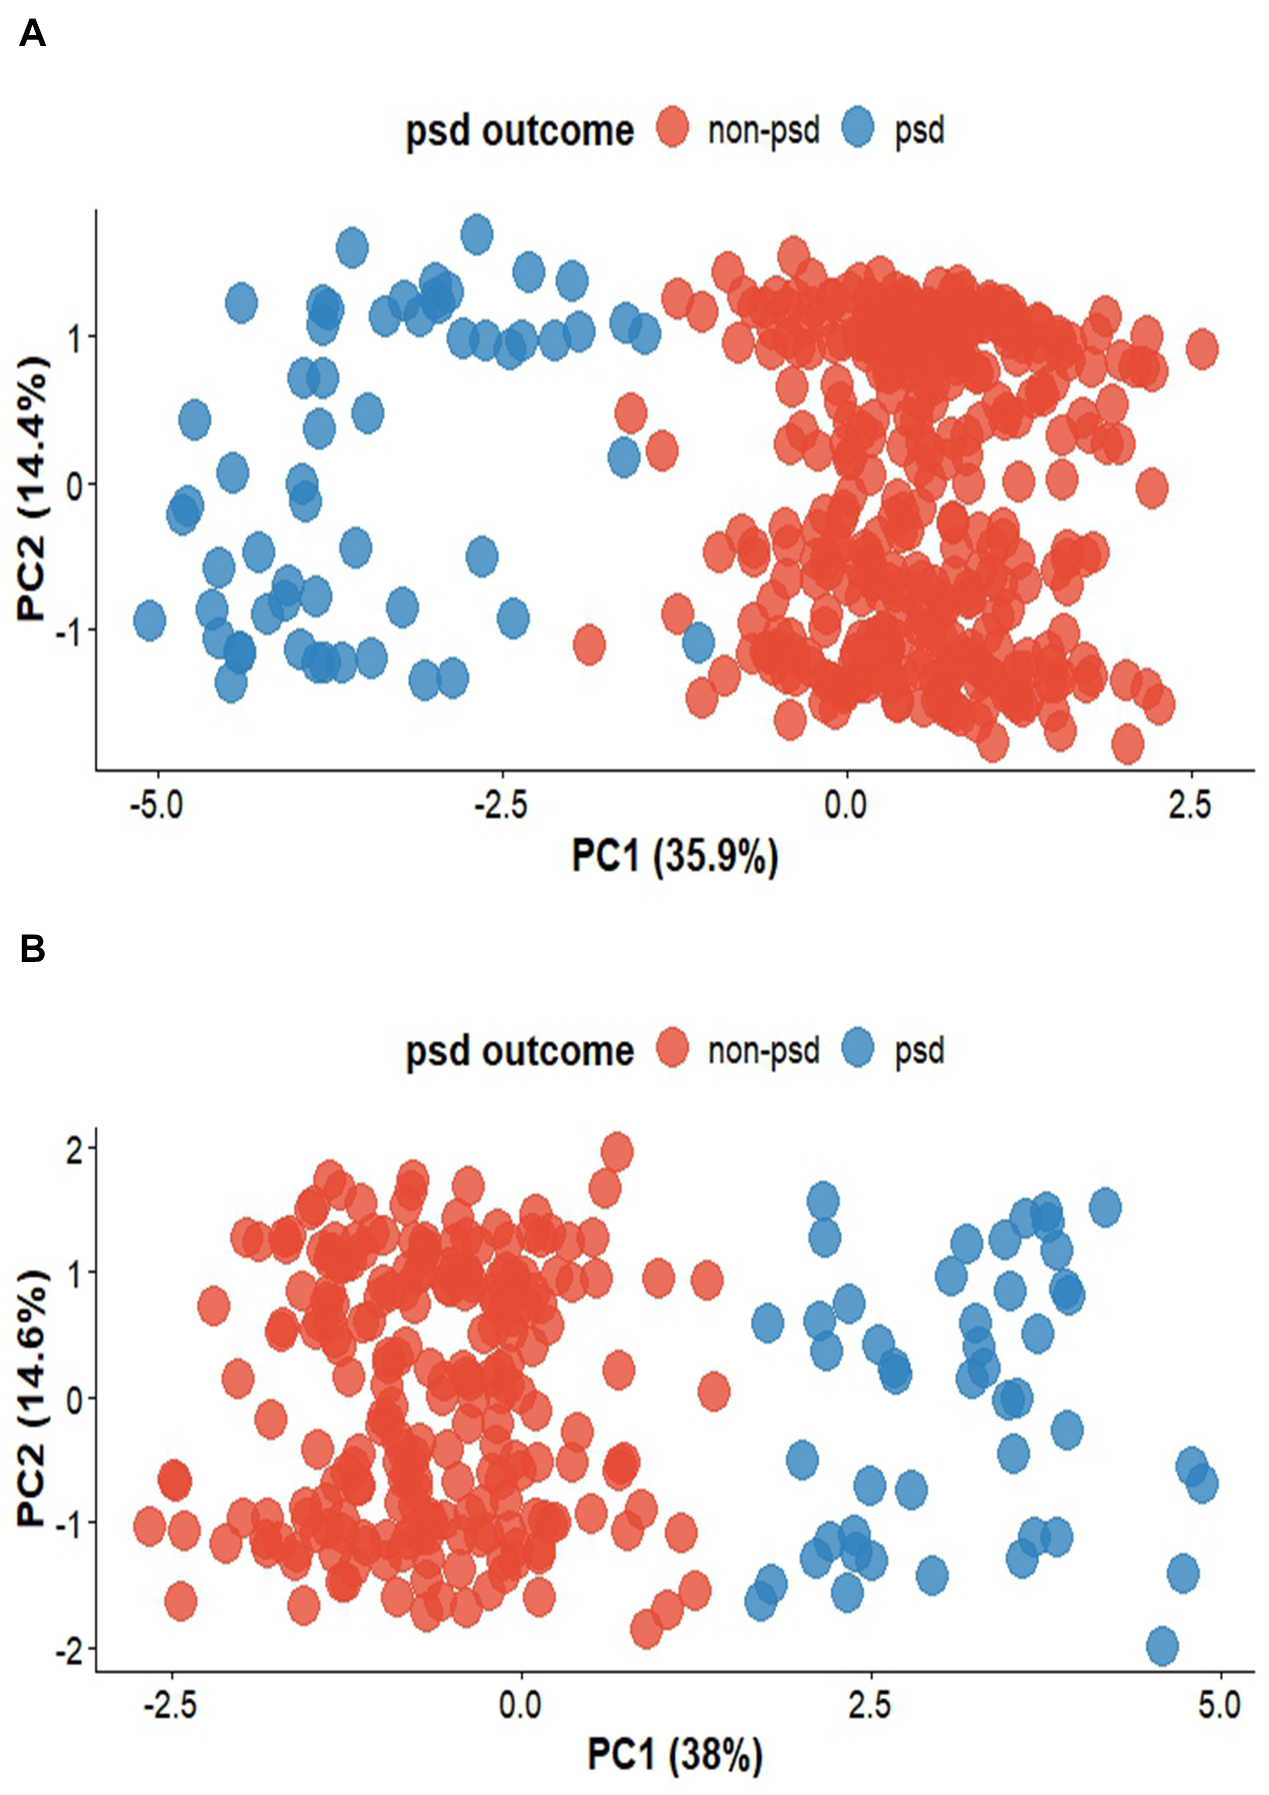


Supplementary figure 1. Principal Component Analysis (PCA) for Evaluating the Predictive Performance of the PSD Nomogram Model: Training Set (A) and Testing Set (B).
